# Supplementary material
Source: PubMed Central journal article supplement (PMC4114588)
Supplement: sgtp-5-e29290-s01.pdf [file sgtp-5-e29290-s01.pdf]

## **Supplemental Material to:**

**Hotaka Kobayashi, Kan Etoh, Mitsunori Fukuda**

**Rab35 is translocated from Arf6-positive perinuclear recycling endosomes to neurite tips during neurite outgrowth**

**May 2014; 5**

**<http://dx.doi.org/10.4161/sgtp.29290>**

**[http://www.landesbioscience.com/journals/smallgtpases/  
article/29290](http://www.landesbioscience.com/journals/smallgtpases/article/29290)**

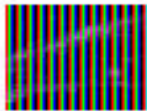

**Supplementary Movie 1.** Related to Fig. 3, box2. EGFP-Rab35-Q67L-positive vesicles move toward or into neurites. Images were captured at 2-sec intervals for 42 sec, and movies were made by 7-frames per sec.
